1 **Positive selection in the genomes of two Papua New Guinean populations at**  
2 **distinct altitude levels**

3 Mathilde André<sup>1</sup>, Nicolas Brucato<sup>2</sup>, Georgi Hudjasov<sup>3</sup>, Vasili Pankratov<sup>3</sup>, Danat  
4 Yermakovich<sup>3</sup>, Rita Kreevan<sup>3</sup>, Jason Kariwiga<sup>4,5</sup>, John Muke<sup>6</sup>, Anne Boland<sup>7</sup>, Jean-  
5 François Deleuze<sup>7</sup>, Vincent Meyer<sup>7</sup>, Nicholas Evans<sup>8</sup>, Murray P. Cox<sup>9</sup>, Matthew  
6 Leavesley<sup>10,11</sup>, Michael Dannemann<sup>3</sup>, Tõnis Org<sup>3</sup>, Mait Metspalu<sup>1</sup>, Mayukh  
7 Mondal<sup>3,12\*</sup>, François-Xavier Ricaut<sup>2\*</sup>

8 \*These authors contributed equally

9 Corresponding authors:

10 [mondal.mayukh@gmail.com](mailto:mondal.mayukh@gmail.com)

11 [francois-xavier.ricaut@univ-tlse3.fr](mailto:francois-xavier.ricaut@univ-tlse3.fr)

12 **Affiliations:**

- 13 1. Estonian Biocentre, Institute of Genomics, University of Tartu, Riia 23b, 51010 Tartu,  
14 Tartumaa, Estonia
- 15 2. Laboratoire Évolution and Diversité Biologique (EDB UMR5174), Université de  
16 Toulouse Midi-Pyrénées, CNRS, IRD, UPS, Toulouse, France
- 17 3. Centre for Genomics, Evolution & Medicine, Institute of Genomics, University of  
18 Tartu, Riia 23b, 51010 Tartu, Tartumaa, Estonia
- 19 4. Strand of Anthropology, Sociology and Archaeology, School of Humanities and Social  
20 Sciences, University of Papua New Guinea, PO Box 320, University 134, National  
21 Capital District, Papua New Guinea
- 22 5. School of Social Science, University of Queensland, St Lucia, Queensland, Australia
- 23 6. Social Research Institute Ltd, Port Moresby, Papua New Guinea
- 24 7. Université Paris-Saclay, CEA, Centre National de Recherche en Génomique  
25 Humaine (CNRGH), 91057, Evry, France
- 26 8. ARC Centre of Excellence for the Dynamics of Language, Coombs Building, Fellows  
27 Road, CHL, CAP, Australian National University, Australia
- 28 9. School of Natural Sciences, Massey University, Palmerston North, New Zealand.
- 29 10. College of Arts, Society and Education, James Cook University, P.O. Box 6811,  
30 Cairns, Queensland, 4870, Australia
- 31 11. ARC Centre of Excellence for Australian Biodiversity and Heritage, University of  
32 Wollongong, Wollongong, New South Wales, 2522, Australia
- 33 12. Institute of Clinical Molecular Biology, Christian-Albrechts-Universität zu Kiel 24118  
34 Kiel, Germany

35 **Keywords**

36 Selection, altitude, New Guinea, hypoxia, introgression

## 37 Abstract

38 Highlanders and lowlanders of Papua New Guinea (PNG) have faced distinct  
39 environmental conditions. These environmental differences lead to specific stress on  
40 PNG highlanders and lowlanders, such as hypoxia and environment-specific pathogen  
41 exposure, respectively. We hypothesise that these constraints induced specific  
42 selective pressures that shaped the genomes of both populations. In this study, we  
43 explored signatures of selection in newly sequenced whole genomes of 54 PNG  
44 highlanders and 74 PNG lowlanders. Based on multiple methods to detect selection,  
45 we investigated the 21 and 23 genomic top candidate regions for positive selection in  
46 PNG highlanders and PNG lowlanders, respectively. To identify the most likely  
47 candidate SNP driving selection in each of these regions, we computationally  
48 reconstructed allele frequency trajectories of variants in each of these regions and  
49 chose the SNP with the highest likelihood of being under selection with CLUES. We  
50 show that regions with signatures of positive selection in PNG highlanders genomes  
51 encompass genes associated with the hypoxia-inducible factors pathway, brain  
52 development, blood composition, and immunity, while selected genomic regions in  
53 PNG lowlanders contain genes related to immunity and blood composition. We found  
54 that several candidate driver SNPs are associated with haematological phenotypes in  
55 the UK biobank. Moreover, using phenotypes measured from the sequenced Papuans,  
56 we found that two candidate SNPs are significantly associated with altered heart rates  
57 in PNG highlanders and lowlanders. Furthermore, we found that 16 of the 44 selection  
58 candidate regions harboured archaic introgression. In four of these regions, the  
59 selection signal might be driven by the introgressed archaic haplotypes, suggesting a  
60 significant role of archaic admixture in local adaptation in PNG populations.

## 61 Introduction

62 After the first arrival of modern humans in New Guinea around 50 thousand years ago  
63 (kya) <sup>1,2</sup>, they rapidly spread across different environmental niches of the island <sup>3,4</sup>.  
64 Since the Holocene (around 11 kya), the Papua New Guinea (PNG) population has  
65 been unevenly distributed, with most of the population living at altitude between 1600  
66 and 2400 meters above sea level (a.s.l.) <sup>5-7</sup>. This population distribution pattern is  
67 remarkable considering the challenges PNG highlanders face at this altitude, like the  
68 lower oxygen availability to the body <sup>8</sup>. Studies investigating hypoxic response of the  
69 human body in high-altitude populations revealed that selection acted on genes  
70 involved in the Hypoxia-Inducible Factor (HIF)-pathway<sup>9,10</sup>, the principal response  
71 mechanism to low oxygen at the cellular level. It regulates angiogenesis,  
72 erythropoiesis, and glycolysis <sup>11</sup>. Some high-altitude populations show a limited  
73 increase in haemoglobin concentration <sup>12</sup> in response to the lower oxygen levels.  
74 Indeed, an increase in haemoglobin concentration – as observed in native lowlanders  
75 accessing altitude – increases oxygen transport but also results in higher blood  
76 viscosity <sup>13</sup>. In the long term, that process may cause Chronic Mountain Sickness  
77 (CMS) and cardiovascular complications <sup>13</sup>. Interestingly, Tibetan highlanders show  
78 selection that is associated with a more restrained increase of haemoglobin  
79 concentration at altitude due to increased plasma volume <sup>14</sup>. This suggests that  
80 hypoxia might lead to the selection of a complex haematological response that  
81 overcomes the increase in blood viscosity when enhancing oxygen transport.  
82 However, the role of selection in response to the environmental challenges by altitude  
83 on the genomes of PNG highlanders, who inhabited this environment for the last  
84 20,000 years <sup>4</sup>, remains mostly unknown. PNG highlanders significantly differ from  
85 PNG lowlanders in height, chest depth, haemoglobin concentration, and pulmonary  
86 capacities <sup>15</sup>. Similar differences have been observed between Andean, Tibetan and  
87 Ethiopian highlanders and their corresponding lowland populations <sup>16</sup>. However  
88 various factors, like phenotypic plasticity <sup>17</sup>, diet or physical activities, could explain  
89 these phenotype differences. In this paper we explored whether these phenotypes can  
90 also be linked to adaptive processes acting on the genome of the PNG highlanders.

91 Other strong environmental pressures in PNG are infectious diseases (e.g., malaria,  
92 dysentery, pneumonia, tuberculosis, etc) that are the leading cause of death in PNG  
93 <sup>18-20</sup>. In this pathogenic environment, malaria stands out among others and could have

94 affected selective pressure in highlanders and lowlanders differently. Incidence of  
95 malaria varies enormously between the lowlands and the highlands. While PNG  
96 accounted for nearly 86% of the malaria cases in the Western Pacific Region in 2020  
97 <sup>21</sup>, malaria is practically absent in PNG highlands, possibly because of a limited  
98 dispersal of *Anopheles*, the main vector of malaria, at high altitude <sup>6,22</sup>. It has been  
99 suggested that malaria might explain the unbalanced population distribution between  
100 PNG highlands and lowlands <sup>7,23,24</sup> and thus induces a selection pressure specific to  
101 lowlanders. Nonetheless, the period when this specific pathogenic pressure started to  
102 impact Papuans remains unclear.

103 Besides facing these environmental pressures, PNG populations also stand out by  
104 their high levels of Denisovan introgression <sup>25,26</sup>. Denisovan introgressed variant might  
105 contribute to Tibetans adaptation to altitude <sup>27</sup> and affect the immune system of the  
106 PNG population <sup>28</sup>. Moreover, because some archaic variants show signals of selection  
107 among the overall Papuan population <sup>29-31</sup>, it is conceivable that archaic introgression  
108 has contributed to beneficial alleles in PNG populations. However, to date it remains  
109 elusive how to which extent archaic introgression contribution to local adaptation varies  
110 between PNG populations.

111 In this study, we identify the genomic regions that show signatures of selection in 54  
112 newly sequenced PNG highlanders and 74 lowlanders. We then screen for the SNP  
113 that most likely drives the selection signal in each genomic region under selection. We  
114 then explore phenotype associations with candidate SNPs. Finally, we scan selection  
115 candidate regions for the presence of introgressed archaic haplotypes and assess the  
116 role of introgressed alleles on adaptive processes. Our research provides new insights  
117 into local adaptation in PNG populations and its implications on health.

118

## 119 **Material and Methods**

### 120 **Ethics**

121 This study was approved by the Medical Research Advisory Committee of Papua New  
122 Guinea under research ethics clearance MRAC 16.21 and the French Ethics  
123 Committees (Committees of Protection of Persons CPP 25/21\_3, n\_S1 :  
124 21.01.21.42754). Permission to conduct research in PNG was granted by the National  
125 Research Institute (visa n°99902292358) with full support from the School of  
126 Humanities and Social Sciences, University of Papua New Guinea. All samples were  
127 collected from healthy unrelated adult donors who provided written informed consent.  
128 After a full presentation of the project to a wide audience, a discussion with each  
129 individual willing to participate ensured that the project was fully understood.

### 130 **Samples**

131 DNA was extracted from saliva samples with the Oragene sampling kit according to  
132 the manufacturer's instructions. Sequencing libraries were prepared using the TruSeq  
133 DNA PCR-Free HT kit. About 150-bp paired-end sequencing was performed on the  
134 Illumina HiSeq X5 sequencer. We sequenced PNG whole genomes from PNG  
135 lowlanders from Daru (n=38, <100 m above sea level (a.s.l)) and PNG highlanders  
136 from Mount Wilhelm villages (n=46, 2,300 and 2,700 m a.s.l.) sampled between 2016  
137 and 2019 (EGA accession code XXXXX). To increase our sample size, we included  
138 58 published genomes sampled in Port Moresby, including individuals from different  
139 regions in PNG<sup>3</sup>. We also gained access to PNG whole genome sequences from  
140 samples collected at the same sampling places during the same period and sequenced  
141 at the National Center of Human Genomics Research (France) or the KCCG  
142 Sequencing Laboratory (Garvan Institute of Medical Research, Australia) (unpublished  
143 data; F-X. Ricaut personal communication). These additional datasets increased our  
144 sample size to a total of 262 PNG whole genomes with 60 individuals from Mount  
145 Wilhelm (PNG highlanders), 80 individuals from Daru (PNG lowlanders) and 122  
146 individuals sampled in Port Moresby from different origins (PNG diversity set I) (Note  
147 S1, Tables S1-S2). We measured phenotypes associated with body proportion,  
148 pulmonary capacities and cardiovascular components in this PNG dataset<sup>15</sup> (Note S2,  
149 Table S3).

150 We combined these 262 sequences with published Papuan genomes (n=81, PNG  
151 diversity II) <sup>30,32–35</sup> and high-coverage genomes from the 1000 Genomes project from  
152 Africa (n=207), East Asia (n=202) and Europe (n=190) <sup>36</sup> (Note S1).

### 153 **Variant Calling**

154 Sequencing data for all samples used in this study were processed together, starting  
155 from the raw reads. FASTQ files were trimmed with fastp v0.23.2 <sup>37</sup> and converted to  
156 BAM using Picard Tools FastqToSam v2.26.2 <sup>38</sup>. Further processing was performed  
157 with Broad Institute's GATK Germline short variant discovery (SNPs and Indels) Best  
158 Practices <sup>39</sup>. HaplotypeCaller tool was used to produce individual sample GVCF files,  
159 which were further combined by JointGenotyping workflow to create multi-sample VCF  
160 files. GATK v4.2.0.0 was used <sup>40</sup>. Data were processed with GRCh38 genome  
161 reference (Note S3).

### 162 **Filtering**

163 Unless otherwise stated, we performed the analysis on biallelic SNPs with a maximal  
164 missing rate of 5% that remained after genomic masking (Note S7). For each pair of  
165 related individuals to the second degree, when relevant, we kept the individuals with  
166 the highest number of phenotypes measurements or the individual with the highest  
167 mean of coverage. We removed two PNG samples with low call rate from any further  
168 analysis. Quality and kinship filtering resulted in 249 unrelated genomes among the  
169 PNG highlanders, lowlanders and the PNG diversity set I: 54 sequences of PNG  
170 highlanders, 74 sequences from PNG lowlanders and 121 sequences from individuals  
171 originating from different parts of PNG and sampled in Port Moresby (PNG diversity  
172 set I; Notes S1, S4-S7, Tables S1-S4, Figures S1-S2). The unrelated and filtered  
173 dataset also includes 262 published Papuan sequences (n=81, PNG diversity II) <sup>30,32–</sup>  
174 <sup>35</sup> and sequences from the 1000 Genomes project from Africa (n=207), East Asia  
175 (n=202) and Europe (n=190) <sup>36</sup> (Note S1).

### 176 **Population structure**

177 Principal Component Analysis (PCA) was performed on the unrelated dataset filter for  
178 variant with minor allele frequency <5% and pruned for linkage disequilibrium (Note  
179 S8) using the smartpca program from the EIGENSOFT v.7.2.0 package <sup>41</sup>. To prune  
180 variants in high linkage disequilibrium, we used PLINK v.1.9 using the default  
181 parameters of 50 variants count window shifting from five variants and a variance

182 inflation factor (VIF) threshold of 2<sup>42</sup>. The LD pruned dataset included 469,584 SNPs  
183 (4,809,440 SNPs before pruning).

184 We used the R-3.3.0 software to plot the PCA. We computed the PCA to the tenth  
185 principal component. We ran ADMIXTURE v1.3<sup>43</sup> on the same dataset from  
186 components K=2 to K=6. To define how many components composed the most likely  
187 model, we computed each component's confidence interval of the cross-validation  
188 error by repeating it 50 times (Note S9).

### 189 **Phasing**

190 We phased genomes from Mt Wilhelm, Daru, PNG diversity set I, Africa, Asia and  
191 Europe using shapeit4 (v4.2.2)<sup>44</sup>. We phased the samples statistically without  
192 reference, as the reference haplotypes panel for the PNG population does not exist  
193 (Note S10).

### 194 **Selection analysis**

195 We aimed to identify genomic regions carrying signatures of positive selection in PNG  
196 highlanders and lowlanders using three metrics. We computed Population Branch  
197 Statistic (PBS), a method based on allele frequency, to detect recent natural selection  
198 signals in PNG highlanders and lowlanders<sup>45</sup> (Note S11). For the PBS scores in PNG  
199 highlanders, we used PNG lowlanders as reference and Yorubas (YRI) from 1000  
200 Genome as the outgroup. When performing PBS on PNG lowlanders, we used PNG  
201 highlanders as reference and the YRI as the outgroup. In both cases, we obtained a  
202 PBS score for every biallelic SNP. We then defined sliding windows of 20 SNPs with a  
203 step of 5 SNPs to identify multiple adjacent SNPs with an elevated PBS score (which  
204 lowers the random chances due to drift). We assigned the average PBS score of all  
205 the SNPs included in the sliding window as the PBS score of the window. We kept the  
206 sliding windows with an average PBS score in the 99<sup>th</sup> percentile and merged the top  
207 sliding windows that are 10kb maximum from each other. The top PBS score of the  
208 sliding windows in the region was given to the whole merged region.

209 In addition, we computed the cross-extended haplotype homozygosity (XP-EHH)<sup>46</sup> on  
210 the phased dataset with selscan (v2.0.0)<sup>47</sup> to test for positive selection using haplotype  
211 information (Note S12). We computed XP-EHH using PNG highlanders as the target  
212 population and PNG lowlanders as the reference population. While the maximal scores  
213 define regions under selection in PNG highlanders, the lowest scores indicate the

214 regions under selection in PNG lowlanders. We determined the top SNPs for XP-EHH  
215 score in PNG highlanders as the SNP with XP-EHH score in the 99<sup>th</sup> percentile. We  
216 kept the SNPs with XP-EHH score in the 1st percentile for PNG lowlanders. We  
217 merged these top SNPs in windows: two top SNPs distant by at most 10kb are included  
218 in the same window. This merging step results in windows whose endpoints are the  
219 two most distant top SNPs included in the window.

220 Next, we combined the PBS and XP-EHH scores in a Fisher score <sup>48</sup> (Note S13). We  
221 used the sliding windows of 20 SNPs, and 5 SNPs step defined for the PBS score. For  
222 each of these sliding windows, we gave as XP-EHH score the highest XP-EHH score  
223 among the 20 SNPs included in the windows. We combined the PBS and XP-EHH  
224 scores in a Fisher Score  $(-\log_{10}(PBS_{percentilrank}) - \log_{10}(XP - EHH_{percentilrank}))$  <sup>48</sup> for  
225 each sliding window. Finally, we selected the windows Fisher Score in the 99<sup>th</sup>  
226 percentile and merged them when they were distant of maximum 10kb. We extended  
227 the top 10 merged windows with the highest score for each of the three methods by a  
228 50kb flanking region. Finally, we merged the overlapping regions from these 30 top  
229 regions to obtain the final non-overlapping regions of interest that we will use further.

230 Because of the low number of individuals per population in the PNG diversity sets I  
231 and II and the high genetic diversity in PNG (Figures S3-S4), we did not include these  
232 samples in the selection analyses described above.

### 233 **Selection of the SNPs of interest**

234 We computed ancestral recombination graphs for the phased dataset with Relate  
235 (v1.1.8) <sup>49</sup> (Note S14). We generated coalescence rates through time within PNG  
236 highlanders and lowlanders from their respective subtrees. Finally, we extracted the  
237 local tree for each SNP in the regions of interest from PNG highlanders and lowlander  
238 subtrees. We used these local trees as input for Coalescent Likelihood Under Effects  
239 of Selection (CLUES) (v1) <sup>50</sup> (Note S15). CLUES assigns a likelihood ratio (logLR) to  
240 each SNP of interest that reflects the support for the non-neutral model. For each SNP  
241 in the region of interest, we computed logLR five times by re-sampling the local tree  
242 branch length and averaged the logLR for the five runs. To decide between the top five  
243 SNPs with the higher average logLR in each genomic region, we generated the logLR  
244 50 additional times for these five SNPs. We considered the SNP with the highest  
245 average log LR after 50 runs as the SNP the most likely to drive selection within the  
246 regions under selection (aka candidate SNPs). Because SNPs with low DAF (Derived



247 Allele Frequency) are unlikely to be under selection, we did not consider SNPs with  
248 DAF lower than 5%. We also filtered out fixed variants for which CLUES cannot  
249 compute the logLR.

### 250 **Association in the UK biobank**

251 To further understand how the candidate SNPs affect phenotypes, we downloaded the  
252 UK biobank's summary statistics <sup>51</sup> for the 1,931 phenotypes with more than 10,000  
253 samples (Note S17). We extracted the p-value and the beta of the candidate SNPs for  
254 each phenotype. To avoid the ancestry sample size bias present in UKBB, we only  
255 extracted the p-value (pval\_EUR) and beta score (beta\_EUR) for European ancestry.  
256 Because the PNG population has a unique genetic diversity absent in Europeans,  
257 some candidate SNPs were not listed in the UK biobank. In that case, we looked for  
258 summary statistics for the closest SNP from a 1kb upstream and 1kb downstream  
259 region. After extracting the SNP summary statistics for every phenotype, we only  
260 consider the phenotype of interest if the log(p-value) is lower than -11.29 to correct for  
261 multiple testing considering the significance threshold of  $\log(10^{-8})$  that needs to be  
262 corrected for the number of phenotypes studied ( $\log_{10} \frac{10^{-8}}{1931}$ ). Finally, we corrected the  
263 orientation of the beta value from the alternative allele to the derived allele.

### 264 **Association test**

265 We used Genome-wide Efficient Mixed Model Association (GEMMA) (v0.98.4) <sup>52</sup> to  
266 detect if the candidate SNPs are associated with any phenotypes that we measured in  
267 the PNG highlanders, lowlanders and PNG diversity set I datasets (Note S16). As we  
268 did previously <sup>15</sup>, we corrected the haemoglobin concentration, blood pressure, heart  
269 rate and BMI for age and gender and the chest depth, waist circumference, weight,  
270 and pulmonary function measurements (FEV1, PEF and FVC) for age, gender and  
271 height using a multiple linear regression approach.

272 We performed association tests with a univariate Linear Mixed Model (LMM) for the  
273 SNPs of interest and each corrected phenotype. To increase our sampling size, we  
274 performed these association tests using all the PNG individuals (highlanders,  
275 lowlanders and PNG diversity set I) with at least one phenotype measurement (n=234)  
276 (Table S3). We incorporated into the LMM the centred relatedness matrix computed  
277 with GEMMA using all the 234 PNG sequences to correct for population stratification.  
278 We corrected each p-value for the number of SNPs tested with the Benjamini-  
279 Hochberg procedure <sup>53,54</sup>. Because these phenotypes can be gathered in five groups

280 of highly correlated phenotypes <sup>15</sup>, we used a threshold for significance of 0.01 (0.05/5)  
281 to correct for the number of phenotypes tested.

## 282 **Introgression**

283 To reveal similarities between PNG haplotypes and archaic haplotypes for the genomic  
284 regions under selection in PNG highlanders and lowlanders, we used haplostrips (v1.3)  
285 <sup>55</sup> within PNG, African, Asian and European samples with Altai <sup>56</sup> Neanderthal or  
286 Denisovan <sup>57</sup> genome as reference haplotypes (Note S18). We explored archaic allele  
287 frequencies in the Papuans from the SGDP dataset <sup>34</sup> in the regions with introgressed  
288 haplotypes in PNG highlanders and lowlanders. We calculated these frequencies on  
289 aSNPs, which were defined to be SNPs with one allele (i) present in at least PNG high-  
290 or lowlander, (ii) found in a homozygous state in one of the three archaics of the Altai,  
291 Vindija Neanderthals and Denisovan <sup>56-58</sup> and (iii) being absent in the 1,000 Genomes  
292 YRI population.

## 293 **Prediction of variant effect**

294 As an additional effort to decipher the function of the candidate SNPs (e.g. gene  
295 expression or changes in protein sequence), we looked for significant eQTLs for each  
296 candidate SNP using the Genotype-Tissue Expression (GTEx) Portal <sup>59</sup>. In addition,  
297 we downloaded the 111 reference human epigenomes from the Roadmap  
298 epigenomics project <sup>60</sup> to explore which chromatin state the candidate SNPs fall in  
299 different tissue types. Finally, we used The Ensembl Variant Effect Predictor (VEP) <sup>61</sup>  
300 on the region under selection to detect missense variants in these regions with the  
301 canonical flag.

## 302 Results and discussion

### 303 Selection scans results in PNG highlanders and PNG lowlanders

304 To study selection specific to PNG highlanders or PNG lowlanders, we used 54 newly  
305 sequenced genomes from three villages in PNG Highlands located in Mount Wilhelm  
306 between 2,300 and 2,700 meters above sea level (a.s.l.) and 74 newly sequenced  
307 genomes from Daru island (<100 m a.s.l.). We computed frequency-based (PBS) and  
308 haplotype-based (XP-EHH) selection statistics – two selection tests based on distinct  
309 genetic signatures – to detect candidate regions for selection in PNG highlanders and  
310 lowlanders. Both selection statistics require a target and reference population, allowing  
311 us to identify the signal of selection within the target population (PNG highlanders or  
312 PNG lowlanders) but absent in the reference population (PNG lowlanders or PNG  
313 highlanders, respectively). We also combined both these statistics in a Fisher Score <sup>48</sup>  
314 to detect the region with extended haplotype homozygosity and carrying multiple  
315 variants with high allele frequency. For each selection statistic (PBS, XP-EHH and  
316 Fisher Score), we kept the ten regions with the highest score leading to 30 genomic  
317 regions of interest for PNG highlanders and lowlanders (Tables S5-S6). We merged  
318 the overlapping regions between methods, resulting in a final number of 21 regions of  
319 interest in PNG highlanders (Tables 1, S5, Figure 1) and 23 in PNG lowlanders (Tables  
320 2, S6, Figure 1).

321 The 21 regions showing signatures of selection in PNG highlanders encompass 54  
322 genes, including genes involved in the regulation of platelet adhesion (ex: *FBLN1* <sup>62</sup>),  
323 HIF-pathway (ex: *LINC02388* <sup>63</sup>), neurodevelopment (ex: *DLGAP1* <sup>64</sup>) and immunity  
324 (ex: MHC locus <sup>65</sup>) (Tables 1, S5, Figure 1). The region with the highest Fisher score  
325 and second highest PBS and XP-EHH scores in PNG highlanders includes the long  
326 intergenic non-protein coding RNA *LINC02388*. This intergenic RNA is associated with  
327 the serum levels of protein LRIG3 <sup>63</sup> that impact angiogenesis – the formation of new  
328 blood vessels – in glioma cells through regulation of the HIF-1 $\alpha$ /VEGF pathway <sup>66,67</sup>.  
329 Comparably to other axes of the HIF pathway under selection in high-altitude  
330 populations <sup>9,10</sup>, we hypothesise that this selection signature on *LINC02388* might  
331 reflect adaptive processes counteracting hypoxia by affecting the formation of new  
332 blood vessels. This axis of the HIF pathway might maintain oxygen transport to  
333 appropriate levels in PNG highlanders while limiting the increase in haemoglobin  
334 concentration and blood viscosity. Moreover, five of the ten regions with the highest

335 Fisher score include a gene associated with cardiovascular phenotypes (*FBLN1*<sup>62</sup>,  
336 *GLT8D2*<sup>68</sup>, *DLGAP1*<sup>69</sup>, *PTPRG*<sup>70</sup> and *SLC24A4*<sup>71</sup>). This observation supports our  
337 hypothesis that selection in PNG highlanders acted on genes that might have helped  
338 them to counteract the hypoxic condition of their environment.

339 Genomic selection candidate regions in PNG lowlanders encompassed multiple  
340 immunity-related genes (*PLAC8*<sup>72</sup>, *SEC31A*<sup>73</sup>, *PDCD1*<sup>74</sup>, *DYNLL1*<sup>75</sup>) (Tables 2, S6,  
341 Figure 1). Notably, the region with the highest XP-EHH, PBS and Fisher Score includes  
342 several genes from the guanine-binding protein family (GBP). This gene family is  
343 associated with protective effects against diverse pathogens<sup>76</sup>. The lowlander-specific  
344 selection signature for this gene family, supports the hypothesis that adaptive  
345 processes in this population were linked to the specific pathogenic pressure PNG  
346 lowlanders faced.

#### 347 **Selected SNPs phenotypic associations**

348 Next, we sought to identify the most likely selection target SNPs in each candidate  
349 region. To this end we reconstructed allele frequency trajectories through time for all  
350 the SNPs in a candidate region for selection for the last 980 generations (27,440  
351 years), using CLUES<sup>50</sup> and selected the SNP with the largest average log(LR) (here  
352 onwards they will be regarded as candidate SNPs; Tables 1-2, S7-S10). Next, we  
353 applied two complementary approaches to explore the phenotypic effects of each  
354 candidate SNPs. First, we queried GWAS summary statistics from the UK Biobank for  
355 each candidate SNP. Seven candidate SNPs of PNG highlanders (or the closest SNPs  
356 when the candidate SNP was not present in the UK Biobank) demonstrate significant  
357 association with at least one phenotype of the UK Biobank (Table 1, Table S11-S12).  
358 Three of these SNPs are significantly associated with haematological phenotypes.  
359 Similarly, among PNG lowlanders, eight candidate SNPs show significant associations  
360 in the UK Biobank and four with haematological phenotypes (Table 2, Table S13-S14).

361 We were able to replicate associations of these SNPs under selection and  
362 cardiovascular components using phenotypes measurement done for PNG  
363 highlanders, lowlanders and PNG diversity set I datasets. After correction for age,  
364 gender and the number of tested SNPs, we identified two significantly associated  
365 SNPs, both of which showed associations with heart rate ( $p_{\text{val adjusted}} < 0.05$ ;  $p_{\text{val}}$   
366 adjusted for the number of SNPs tested) (Figure 2) although this association does not

367 survive after correcting the significance threshold for the number of tested phenotypes  
368 ( $p_{\text{val}_{\text{adjusted}}} > 0.01$ ) (Note S16, Table S15). The derived allele G of rs74576183-A/G, an  
369 intronic variant of *NCAPD2*, that is under positive selection in PNG highlanders based  
370 on CLUES results (Table S7) might be associated with a slower heart rate ( $p_{\text{val}_{\text{adjusted}}} =$   
371  $0.046$ ,  $\beta = -2.981$ ; Table S15, Figure 2). On the contrary, the derived allele T of  
372 rs4693058-C/T, an intronic variant of *SEC31A*, that is under positive selection in PNG  
373 lowlanders (Table S8) might be associated with a faster heart rate ( $p_{\text{val}_{\text{adjusted}}} = 0.046$ ,  
374  $\beta = 3.137$ ; Table S15, Figure 2). Interestingly, these two SNPs showed significant  
375 associations with diverse haematological phenotypes in the UK biobank as well  
376 (Tables S11, S13). It is possible that these associations with heart rate might reflect  
377 an association with other haematological components that were not measured in the  
378 PNG samples. Indeed, heart rate correlates with haematological components that are  
379 usually overlooked and might be the real target of selection <sup>14</sup>.

380 However, both the above-mentioned approaches have limitations. First, associations  
381 from the UK biobank have been detected in a different population than Papuans; the  
382 transferability of the directionality of the beta values of the associations is therefore  
383 limited <sup>77</sup>. Secondly, we did not find any significant phenotype association for top  
384 selection candidate SNPs when correcting for the number of SNPs and phenotypes  
385 tested together. That may be because of the low sample size or the choice of  
386 documented phenotypes that are not the direct target of selection. Nonetheless, the  
387 associations in both analyses with related phenotypes support the hypothesis that  
388 cardiovascular phenotypes were a target of selection within PNG highlanders and  
389 lowlanders.

### 390 **Functional consequences of candidate SNPs**

391 In order to study the potential molecular effects and the most likely target genes of  
392 selection candidate SNPs, we investigated their putative regulatory role and impact on  
393 the protein structure. Five out of 21 candidate SNPs in PNG highlanders and three out  
394 of 23 in PNG lowlanders – including SNPs rs74576183-A/G and rs4693058-C/T whose  
395 derived alleles under selection are associated with heart-rate – show significant eQTLs  
396 in various GTEx<sup>59</sup> tissues (Tables S16-S17). Furthermore, 17 out of the 21 putative  
397 SNPs driving selection in PNG highlanders and 16 out of 23 in PNG lowlanders are in  
398 moderate LD ( $R^2 > 0.5$ ) with at least one variant with a predicted eQTL in the GETx  
399 portal<sup>59</sup> (Tables S18, S19). Finally, 38 out of the 44 candidate SNPs overlapped with

400 open chromatin regions in at least one epigenome (Figures S5, S6). These results  
401 suggest that some of the selection candidate SNPs play a role in gene expression in  
402 various primary tissues and cell types.

403 In addition, we scanned top selected genomic regions for missense variants (Tables  
404 S20, S21). We found 191 variants that alter the protein sequence of 18 genes among  
405 PNG highlanders selected regions. Regions under selection in PNG lowlanders  
406 encompass 85 missense variants that alter 21 genes. In PNG highlanders, one of the  
407 regions under selection (chr12:6502552-6612260) overlaps with one missense variant  
408 (TAPBPL-G151V), a variant with an exceptionally high derived allele frequency (DAF)  
409 in PNG highlanders (DAF = 0.7, <12% in African, Asian or European populations; Table  
410 S20). Moreover, this missense variant is in high LD ( $R^2=0.952297$ ) with the candidate  
411 SNP, rs74576183-A/G. In contrast, the selection candidate region encompassing GBP  
412 overlaps with a missense variant (GBP2-A549P) which is absent in non-Papuan  
413 populations and a DAF of 82% in PNG lowlanders (Table S21). This variant is in  
414 moderate LD ( $R^2=0.57$ ) with the candidate SNP for the region (rs368120563-T/C).  
415 While we expect CLUES top results to be enriched for the causal SNPs of selection, it  
416 remains possible that the real targets of selection are SNPs linked to our candidate  
417 SNPs. In the case of rs368120563-T/C, we suggest that the linked missense variant  
418 GBP2-A549P modifying protein sequence might be the real target of selection for the  
419 genomic region.

#### 420 **Archaic introgressions in loci under selection**

421 We used haplostrips<sup>55</sup> to scan regions with selection signatures in PNG highlanders  
422 or PNG lowlanders for archaic haplotypes. We observed ten such regions in PNG  
423 highlanders (Tables 1, S22). Five of these regions contain archaic SNPs with allele  
424 frequencies that are located within the top 10% in Papuans from the SGDP dataset  
425 (Table S22). The region with the highest XP-EHH, PBS and Fisher score and carrying  
426 *LINC02388* – that might regulate angiogenesis through the HIF/VEGF pathway –  
427 carries an archaic haplotype that shows high sequence similarity with the Altai  
428 Neanderthal. Rs74576183-A/G, the SNP whose derived allele was under selection in PNG  
429 highlanders is associated with a slower heart rate, is located in a region carrying a  
430 Denisovan-like haplotype (Figure S10).

431 Within regions under selection in PNG lowlanders, we observed six regions with  
432 evidence for archaic introgression (Tables 2, S23). Among these is the region  
433 encompassing the immunity-related GBP locus (Figure 3) which exhibits the highest  
434 selection peak in PNG lowlanders and shows haplotypes with sequence similarities to  
435 both Denisovan and Altai Neanderthal. Archaic introgression in this region has  
436 previously been reported in Melanesians<sup>31,35</sup>. But interestingly, the sequence of the  
437 introgressed haplotypes does not match with either Vindija<sup>58</sup> or Chagyrskaya<sup>78</sup>  
438 Neanderthals (data not shown). These two Neanderthals are a better reference for the  
439 introgressed Neanderthal population in non-African populations than Altai Neanderthal  
440<sup>58</sup>. This fact and the gene flow between the Altai Neanderthal and Denisova<sup>57</sup> would  
441 suggest that we most likely observed Denisovan introgression within the GBP locus in  
442 the PNG population.

443 Finally, two candidate SNPs for each studied PNG population (total four SNPs) are  
444 exclusively found on introgressed haplotypes (Figure 3, S7-S9) and absent on non-  
445 archaic haplotypes. Since these SNPs are not fixed on the archaic haplotypes, this  
446 pattern would suggest that the selected mutation appeared after the introgression  
447 event and selection of the mutation led to an increase of the introgressed haplotype.  
448 Another scenario is that Neanderthal and/or Denisovans were variable at this genomic  
449 position and introgressed haplotypes with and without the variant and that both types  
450 of haplotypes are still segregating in present-day Papuans.

#### 451 **Cardio Vascular, a target for selection in PNG highlanders**

452 In summary, our analysis of selective pressures in Papuan highlanders suggest that  
453 top selected regions encompass genes that might have contributed to counteracting  
454 hypoxia detrimental effect in PNG highlanders and that candidate selection SNPs show  
455 associations with blood-related phenotypes. For example, the genomic regions on  
456 chr12 overlapping with the gene *NCAPD2* demonstrates how hypoxic pressure may  
457 have impacted the genome and phenotypes of PNG highlanders. This region shows  
458 the third-highest XP-EHH score in PNG highlanders (Table 1, Figure 1). The candidate  
459 SNP for this region, rs74576183-A/G (Figure 2), overlaps with the gene *NCAPD2* that  
460 is involved in various neurodevelopmental disorders<sup>79–82</sup>. Similarly, genomic regions  
461 under selection in Andeans living at intermediate altitude show enrichment for  
462 neuronal-related genes, which might protect their brain from hypoxic damage<sup>83</sup>.  
463 Indeed, hypoxia at altitude impacts brain development and function when exposed

464 during perinatal life<sup>84,85</sup> or long after birth<sup>86,87</sup>. This candidate SNP derived allele under  
465 selection shows a significant association with increasing red blood cell count in the UK  
466 Biobank (Table S11), and for association with slower heart rate from phenotypes  
467 measured in PNG (Figure 2, Table S15) supports adaptation through some  
468 cardiovascular related process. The fact that this SNP shows significant eQTL  
469 associations and overlaps with open chromatin state in multiple tissues would supports  
470 its role in gene expression regulation. However, because this SNPs is in high LD with  
471 a missense variant with high DAF in PNG Highlanders but rare in other populations  
472 (Table S20), it is also possible that the real target for selection might be the missense  
473 variant (TAPBPL-G151V) that leads to changes in the TAPBPL protein that is  
474 associated with antigen processing. This region under selection overlap with  
475 Denisovan-like archaic haplotypes (Tables 1, S22, Figure S10) but neither the  
476 candidate SNP nor the missense variant derived allele are found in PNG individuals  
477 that carry this archaic haplotype (Figure S10).

#### 478 **Immunity, a target for selection in PNG lowlanders**

479 Similarly, the region containing the gene *SEC31A* and rs4693058-C/T, the candidate  
480 SNP for this region (Figure 2), are of particular interest to selection for pathogenic  
481 pressure in PNG lowlanders. Indeed *SEC31A*<sup>73</sup> might play a role in immune  
482 processes, and the derived allele under selection of rs4693058-C/T, the candidate  
483 SNP for this locus, shows a significant association with various white cells percentages  
484 and counts (Table S13). Interestingly derived allele T under selection of rs4693058-  
485 C/T shows a suggestive association with faster heart rate (Figure 2). But once again,  
486 we suggest that heart rate might be a proxy for other phenotypes (here the white cells  
487 count<sup>88</sup>). Because rs4693058-C/T show significant eQTLs and overlaps with open  
488 chromatin states in multiple tissues (Table S17, Figure S6), we hypothesise that it  
489 impacts gene expression regulation. This region under selection overlaps with an  
490 introgressed haplotype from Denisovan, but the introgressed haplotype does not carry  
491 the derived allele of the candidate SNP (Figure S11).

492 Finally, the regions with the highest XP-EHH, PBS and Fisher Score in PNG lowlanders  
493 (Figure 1, Tables 2, S6), includes several genes from the guanine-binding protein  
494 (GBP) associated with immunity to diverse pathogens<sup>76</sup>. Especially, Apinjuh et al.  
495 reported an association between *GBP7* variant and higher malaria symptoms in the  
496 Cameroon population<sup>89</sup>, suggesting this region might be selected due to malaria. The



497 candidate SNP, rs368120563-T/C, is in LD with a missense variant (GBP2-A549P)  
498 with a high DAF in PNG lowlanders (DAF=0.82) but absent in non-Papuan populations  
499 (Table S21). This missense variant is part of the top 5 SNPs given by CLUES for the  
500 region (Table S10). That might suggest that we failed to identify the real selection  
501 driving SNP when limiting the candidate SNPs to the first top one. This particular  
502 missense variant might be the causal SNP and selection might have targeted a change  
503 in the GBP2 protein sequence. This GBP locus carries a Denisovan-like haplotype that  
504 includes both the candidate variant of the region (rs368120563-T/C) and the missense  
505 variant (GBP2-A549P ) in PNG populations. Moreover, the missense variant can be  
506 found in the Denisovan genome, but the candidate SNP is not present in the Denisovan  
507 or any of the high coverage Neandertal genomes (Figure 3). That pattern is compatible  
508 with the scenario where the candidate variant appeared after the introgression and that  
509 the introgressed haplotype frequency increased in the PNG populations driven by the  
510 selection acting on this variant. The alternative hypothesis would be that the candidate  
511 variant is not the target of selection (most likely the missense variant is), and the  
512 candidate variant is hitchhiked with the selected and introgressed haplotype.

## 513 Conclusion

514 In this paper we investigated selection in PNG highlanders and PNG lowlanders and  
515 detected 21 and 23 genomic regions under positive selection, respectively. Within each  
516 candidate selection region, we identified the SNP that most likely drives selection and  
517 explore their association with several phenotypes measured within our dataset or UK  
518 Biobank summary statistics. The genes in regions that show selection signals in PNG  
519 highlanders are associated with HIF pathway regulation, brain development, blood  
520 composition and immunity. PNG lowlanders show selection for immune system. In both  
521 populations, one of the candidate SNPs suggests an association with heart rate. This  
522 SNP and several top SNPs were also significantly associated with several blood  
523 composition phenotypes in the UK Biobank. Further studies will be needed to clarify  
524 the complexity of the PNG's haematological responses to hypoxia and pathogenic  
525 pressures. We found that 16 regions under selection -10 in PNG highlanders and 6 in  
526 PNG lowlanders – carry archaic introgression. Out of which, two candidate SNPs from  
527 both populations (a total of four) reside directly inside the introgressed haplotypes  
528 suggesting adaptive introgression. Our results suggest that selection in PNG  
529 highlanders and lowlanders was partially targetting introgressed haplotypes from

530 Neandertals and Denisovans. This study demonstrates that both PNG highlanders and  
531 PNG lowlanders carry signatures of positive selection and that the associated  
532 phenotypes largely match with the challenges they faced due to the environmental  
533 differences.

## 534 Authors contribution

535 F.-X.R., N.B., M.L., T.O. and M.Me. designed the study. F.-X.R, N.B., M.L., J.K., N.E.  
536 and J.M. collected the data. V.M., A.B., and J.F.D. generated whole-genome  
537 sequences. M.A., N.B., G.H., V.P., D.Y., R.K. and M.Mo. performed the data analysis.  
538 F.-X.R., M.Me. and M.P.C. provided resources and logistics. M.A., N.B., M.Mo. and F-  
539 X.R. wrote the manuscript with the contribution from all the co-authors.

## 540 Data availability

541 PNG highlanders (n=38) and lowlanders (n=46) sequenced genomes are on the  
542 European Genome-Phenome data repository: EGAXXX.

## 543 Funding

544 M.A. was supported by the European Union through the European Regional  
545 Development Fund (Project No. 2014-2020.4.01.16-0030). , G.H., V.P., R.K., M.D.,  
546 T.O. and M.Mo. were supported by the European Union through Horizon 2020  
547 research and innovation programme under grant no 810645 and the European  
548 Regional Development Fund project no. MOBEC008. This work was supported by the  
549 French Ministry of Foreign and European Affairs (<https://www.diplomatie.gouv.fr>)  
550 (French Prehistoric Mission in Papua New Guinea to F.-X.R.), the French Embassy in  
551 Papua New Guinea (<https://pg.ambafrance.org>), and the University of Papua New  
552 Guinea, Archaeology Laboratory Group. We acknowledge support from the LabEx  
553 TULIP, France (<https://www.labex-tulip.fr>) (to F.-X. R. and N. B.) and the French  
554 Ministry of Research grant Agence Nationale de la Recherche (<https://anr.fr>) number  
555 ANR-20-CE12-0003-01 (to F.-X.R.); from the Leakey Foundation  
556 (<https://leakeyfoundation.org>) (to N. B.). The CNRGH sequencing platform was  
557 supported by the “France Génomique” national infrastructure, funded as part of the  
558 “Investissements d’Avenir” program managed by the “Agence Nationale pour la  
559 Recherche” (contract ANR-10-INBS-09).

## 560 Acknowledgments

561 We kindly thank F.-X. Ricaut for giving us access to additional PNG whole genome  
562 sequences from Daru, Mt. Wilhelm and Port Moresby. These data were generated at  
563 the National Center of Human Genomics Research (France) or the KCCG Sequencing

564 Laboratory (Garvan Institute of Medical Research, Australia). We thank Ray Tobler  
565 (Australian National University), Roxanne Tsang (Centre for Social and Cultural  
566 Research, Griffith University, Australia), Kylie Sesuki and Teppsy Beni (School of  
567 Humanities and Social Sciences, University of Papua New Guinea), and Alois Kuaso  
568 and Kenneth Miamba (National Museum and Art Gallery, Papua New Guinea) for their  
569 help during the sampling campaigns. We especially thank all of our study participants.  
570 Data analyses were carried out in part in the High-Performance Computing Center of  
571 the University of Tartu.

## 572 **Competing interest**

573 The authors declare no competing interest.

574

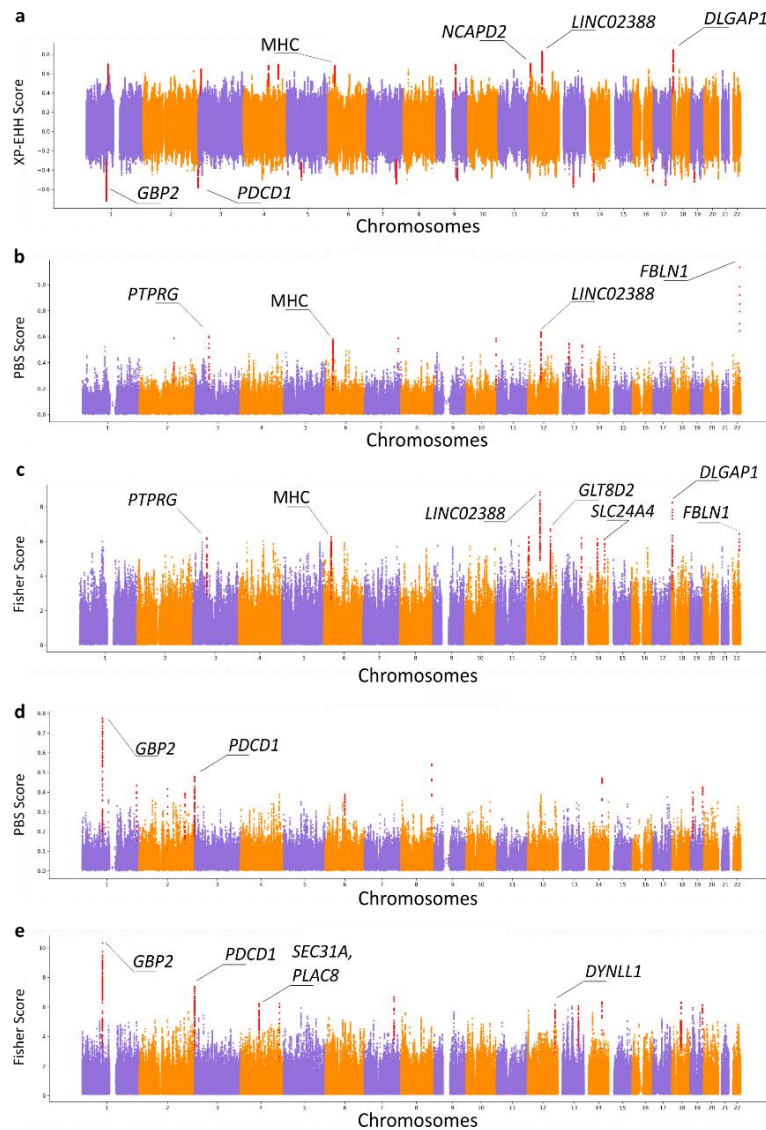

575

576 **Figure 1: Manhattan plots for the three selection scans among PNG highlanders**

577 **and lowlanders.** Candidate genes discussed in the paper are shown. **(a)** XP-EHH

578 scores using PNG highlanders as the target population and PNG lowlanders as the

579 reference population. Genomic regions with the highest score indicate selection in

580 PNG highlanders. Genomic regions with the lowest score indicate selection in PNG

581 lowlanders. **(b)** PBS scores using PNG highlanders as the target population, PNG

582 lowlanders as the reference population, and Yorubas from 1000G as the outgroup. **(c)**

583 Fisher Scores combining the PBS and XP-EHH scores of PNG highlanders. **(d)** PBS

584 scores using PNG lowlanders as the target population, PNG highlanders as the

585 reference population, and Yorubas from 1000G as the outgroup. **(e)** Fisher Scores

586 combining the PBS and XP-EHH scores of PNG lowlanders.

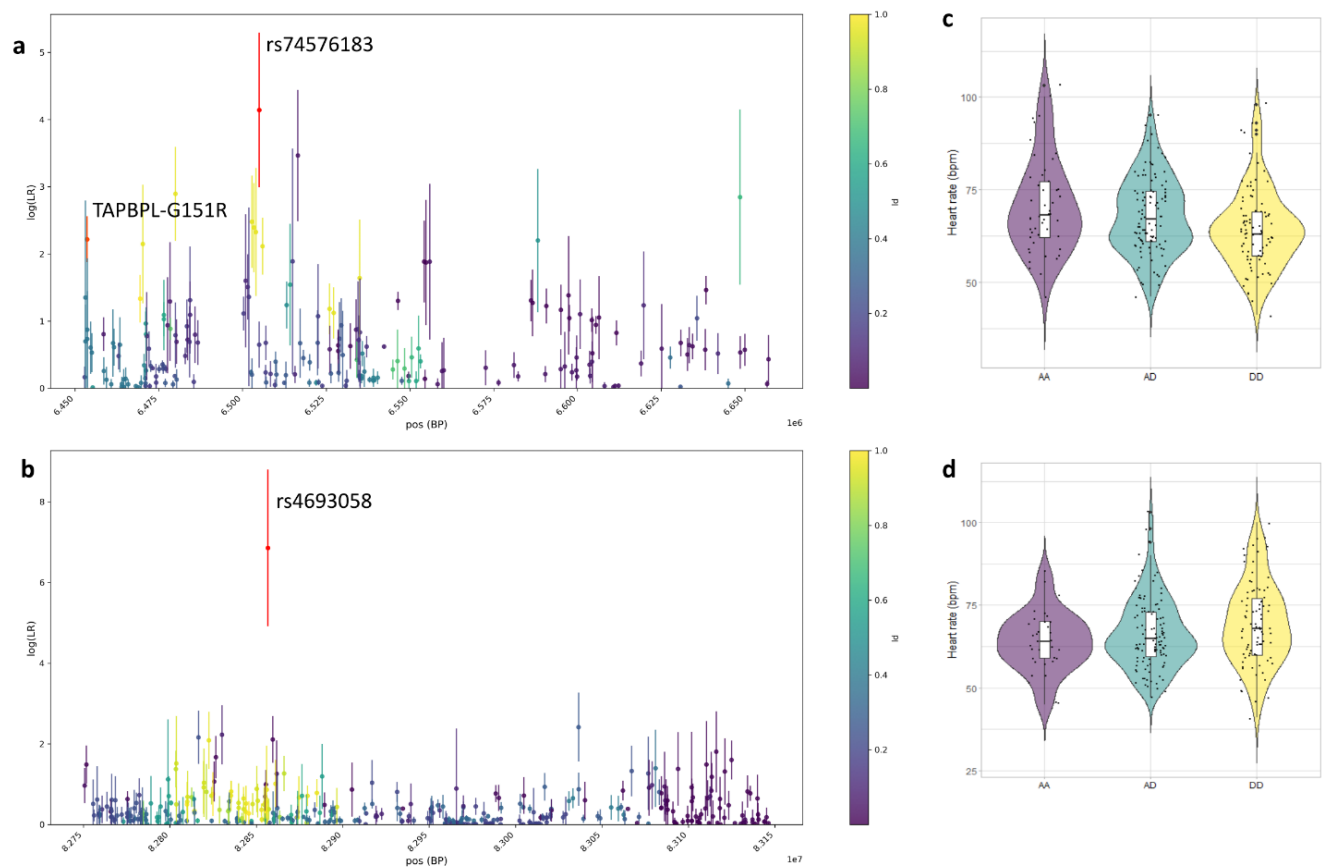

587

588 **Figure 2: a, b  $\log(\text{LR})$  for SNPs in regions under selection** after 5 runs of CLUES  
589 or 50 runs of CLUES for each of the five top SNPs for the candidate region. Candidate  
590 SNP driving selection for the region are shown in red. Colour scale indicates linkage  
591 disequilibrium with the candidate SNP. (a) Region chr12:6452552-6662260, that is  
592 under selection in PNG highlanders. Candidate SNP for the region is rs74576183-A/G.  
593 Missense variant (TAPBPL-G151V) in high LD with rs74576183-A/G is shown in  
594 orange. (b) Region chr4:82750503-83146792, that is under selection in PNG  
595 lowlanders. Candidate SNP is rs4693058-C/T. **c, d Violin plot of the heart rate**  
596 **distribution in PNG depending of their genotype for the candidate SNPs** (A =  
597 ancestral allele, D = derived allele (under selection)) (c) rs7457618-A/G, AA=AA,  
598 AD=AG, DD=GG(d) and rs4693058-C/T, AA=CC, AD=CT, DD=TT.

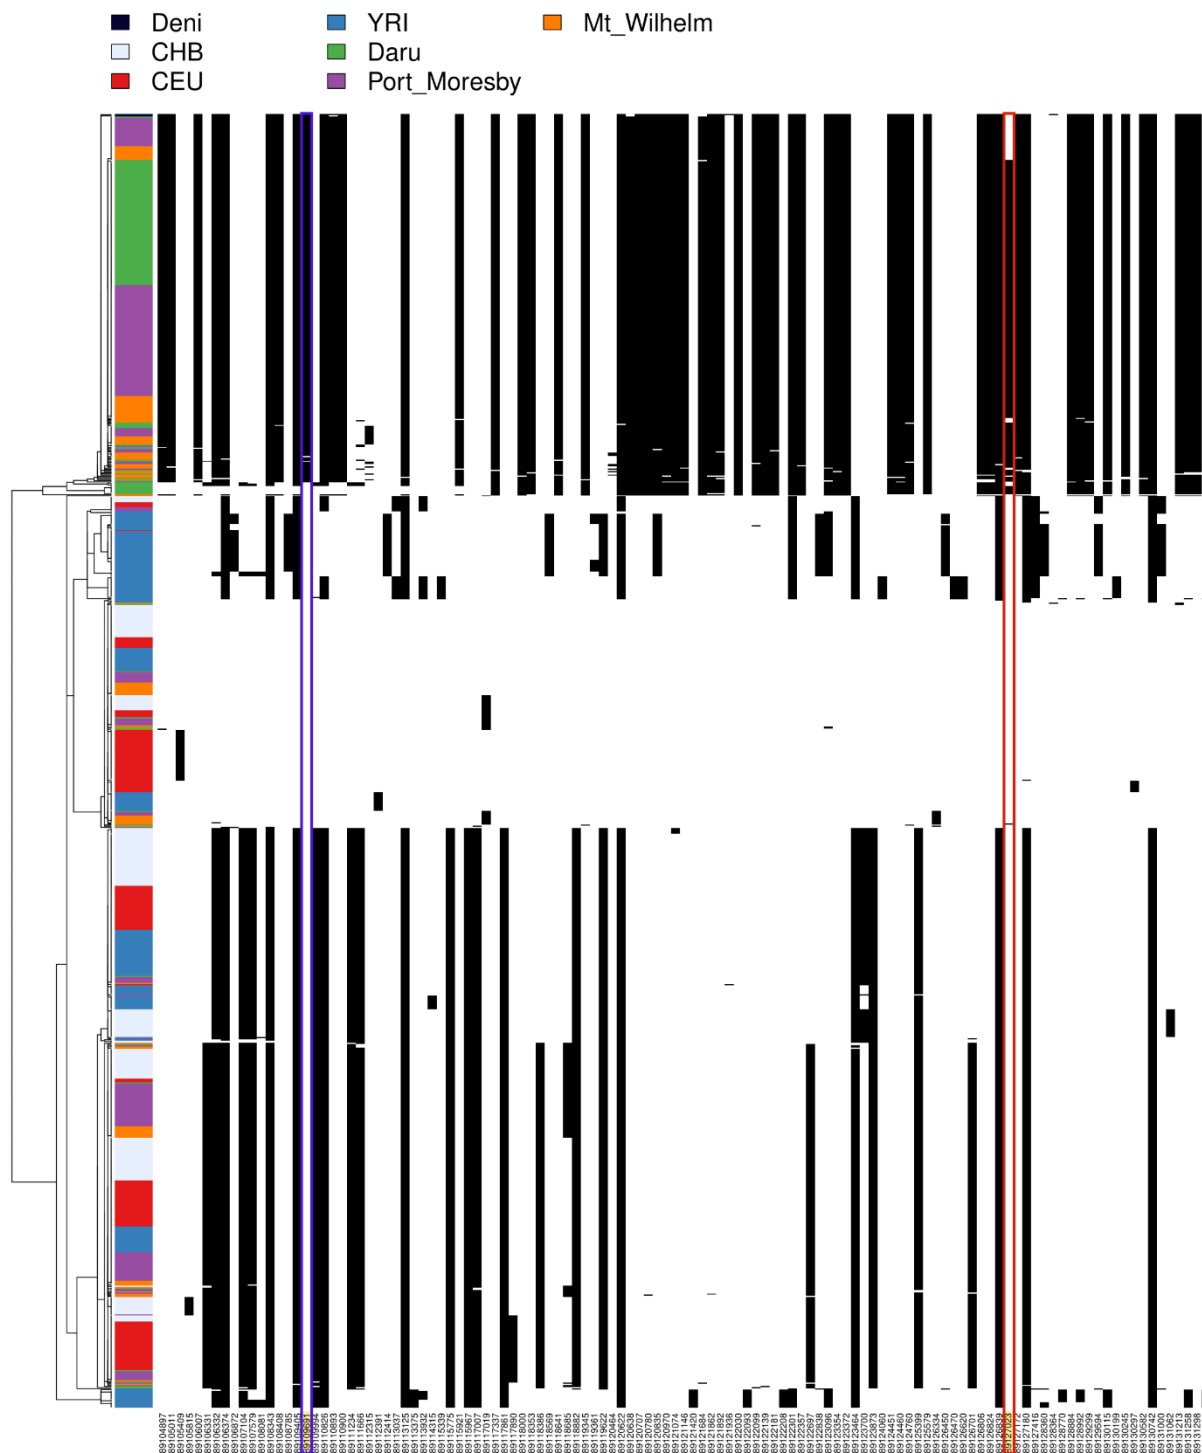

599  
 600 **Figure 3: Haplotrips plot for the region chr1:88800562-89326878 overlapping**  
 601 **with the GBP locus and under selection in PNG lowlanders.** Introgression from  
 602 Altai Denisovas in PNG for in this region. Derived alleles are plotted in black and  
 603 ancestral are in white. The introgressed haplotype carry the SNP driving selection for  
 604 the region (rs368120563-T/C, framed in orange) but the Altai Denisova does not  
 605 have this particular allele. On the contrary, the missense variant (framed in blue) in  
 606 LD with rs36812056 is found in the introgressed haplotype and in Denisovan genome

607 **Table 2: Merged regions under selection and SNP most likely to be selected in PNG highlanders**

| Merged top regions        | Score           | Protein coding genes in the region                                                                  | Archaic introgression | Candidate SNP for the region | DAF  | Significant association (UK Biobank)                             | Distance to the closest SNP in UKBB (BP) |
|---------------------------|-----------------|-----------------------------------------------------------------------------------------------------|-----------------------|------------------------------|------|------------------------------------------------------------------|------------------------------------------|
| chr1:95529290-95736826    | XPEHH           | .                                                                                                   | Denisova              | rs887476833-G/A              | 0.55 | -*                                                               | + 33                                     |
| chr2:151012094-151201575  | PBS             | .                                                                                                   | .                     | rs74621527-G/A               | 0.92 | -                                                                | 0                                        |
| chr3:13010340-13217789    | XPEHH           | <b>IQSEC1</b>                                                                                       | Denisova              | rs374181005-T/C              | 0.41 | -*                                                               | - 50                                     |
| chr3:61779523-62009858    | PBS, Fisher     | <b>PTPRG</b>                                                                                        | .                     | rs79600167-G/A               | 0.77 | -                                                                | 0                                        |
| chr4:110182324-110384099  | XPEHH           | <b>ELOVL6</b>                                                                                       | Altai Neanderthal     | rs943845085-G/A              | 0.42 | -*                                                               | - 22                                     |
| chr4:152704503-152970509  | XPEHH           | <i>TIGD4, ARFIP1, FHDC1</i>                                                                         | .                     | rs369030953-A/G              | 0.59 | -                                                                | - 88                                     |
| chr6:30916070-31153184†   | XPEHH           | <i>VARS2, SFTA2, MUCL3, MUC21, MUC22, HCG22, C6orf5, PSORS1C1, CDSN, PSORS1C2, PSORS1C1, CCHCR1</i> | .                     | rs940110341-G/A              | 0.61 | Blood composition* (Table S12)                                   | + 94                                     |
| chr6:33006055-33132312†   | PBS, Fisher     | <i>HLA-DAO, HLA-DPA1, HLA-DPB2</i>                                                                  | .                     | rs9277772-T/C                | 0.21 | Body proportion, blood composition, other phenotypes (Table S11) | 0                                        |
| chr7:147590904-147718219  | PBS             | <b>CNTNAP2</b>                                                                                      | .                     | rs17170618-T/C               | 0.52 | -                                                                | 0                                        |
| chr9:85458922-85745092    | XPEHH           | <b>AGTPBP1</b>                                                                                      | .                     | rs28728004-C/A               | 0.69 | Other phenotypes* (Table S12)                                    | - 7                                      |
| chr10:131112245-131235951 | PBS             | <b>TCERG1L</b>                                                                                      | Altai Neanderthal     | rs10829909-T/G               | 0.43 | -                                                                | 0                                        |
| chr12:6452552-6662260     | XPEHH           | <i>TAPBPL, VAMP1, MRPL51, GAPDH, NOP2, LPAR5, ING4, ACRBP, CHD4, IFFO1, NCAPD2</i>                  | Denisova              | rs74576183-A/G               | 0.71 | Blood composition (Table S11)                                    | 0                                        |
| chr12:9886812-10055333    | Fisher          | <i>KLRF2, CLEC2A, CLEC12A, CLEC1B, CLEC12B, CLEC9A</i>                                              | .                     | rs536947-C/T                 | 0.91 | -                                                                | 0                                        |
| chr12:58391529-58634980   | XPEHH, PBS, Fis | .                                                                                                   | Altai Neanderthal     | rs376870800-A/G              | 0.70 | -*                                                               | - 160                                    |
| chr12:103783315-104121479 | Fisher          | <b>NT5DC3, HSP90B1, GLT8D2, HCFC2, NFYB, TDG</b>                                                    | Denisova              | rs1032698711-G/A             | 0.47 | -*                                                               | - 22                                     |
| chr13:47639988-47825193   | PBS             | .                                                                                                   | .                     | rs1033760372-C/A             | 0.19 | -*                                                               | - 34                                     |
| chr13:104734734-104875020 | PBS, Fisher     | .                                                                                                   | Denisova              | rs16965509-G/A               | 0.50 | -                                                                | 0                                        |
| chr14:60157772-60377317   | Fisher          | <b>PCNX4, DHRS7, PPM1A</b>                                                                          | Denisova              | rs1033848215-A/G             | 0.32 | Other phenotypes* (Table S12)                                    | - 2                                      |
| chr14:92230479-92401520   | Fisher          | <b>SLC24A4</b>                                                                                      | .                     | rs8003454-C/T                | 0.52 | -                                                                | 0                                        |
| chr18:4072997-4251153     | XPEHH, Fisher   | <b>DLGAP1</b>                                                                                       | Altai Neanderthal     | rs371858795-G/A              | 0.77 | Other phenotypes* (Table S12)                                    | + 124                                    |
| chr22:45519818-45644906   | PBS, Fisher     | <b>FBLN1</b>                                                                                        | .                     | rs1601558750-G/A             | 0.10 | Body proportion* (Table S12)                                     | + 101                                    |

608

609 Genomic coordinates are given for GRCh38

610 DAF is given for PNG lowlanders.

611 †Reference Assembly Alternate Haplotype Sequence Alignments

612 \*SNP not present in the UK Biobank, we look association for the closest SNP within 1KB upstream and downstream region

613 Genes in bold are the closest to the candidate SNP defined with CLUES for the region

614 Putative introgressed regions are given using haplostrips



615 **Table 2: Merged regions under selection and SNP most likely to be selected in PNG lowlanders**

| Merged top regions        | Score              | Protein coding genes in the region                                                                                                                                                                 | Archaic introgression         | Candidate SNP for the region | DAF  | Significant association (UK Biobank)                                                     | Distance to the closest SNP in UKBB (BP) |
|---------------------------|--------------------|----------------------------------------------------------------------------------------------------------------------------------------------------------------------------------------------------|-------------------------------|------------------------------|------|------------------------------------------------------------------------------------------|------------------------------------------|
| chr1:88800562-89326878    | XPEHH, PBS, Fisher | <i>PKN2</i> , <i>GTF2B</i> , <i>KYAT3</i> , <i>RBMXL1</i> , <i>GBP3</i> , <i>GBP1</i> , <b><i>GBP2</i></b> , <i>GBP7</i> , <i>GBP4</i> , <i>GBP5</i>                                               | Denisova<br>Altai Neanderthal | rs368120563-T/C              | 0.87 | .*                                                                                       | + 123                                    |
| chr1:237827847-237992467  | PBS                | <i>RYR2</i> , <b><i>ZP4</i></b>                                                                                                                                                                    | .                             | rs1574154373-G/A             | 0.14 | .*                                                                                       | + 36                                     |
| chr2:124085628-124249405  | PBS                | <b><i>CNTNAP5</i></b>                                                                                                                                                                              | .                             | rs7583123-G/T                | 0.49 | -                                                                                        | 0                                        |
| chr2:200238798-200432145  | PBS                | <b><i>SPATS2L</i></b>                                                                                                                                                                              | .                             | chr2:200269472-A/G           | 0.05 | .*                                                                                       | + 7                                      |
| chr2:241759136-242088831† | XPEHH, PBS, Fisher | <i>GAL3ST2</i> , <i>NEU4</i> , <b><i>PDCD1</i></b> , <i>RTP5</i> , <i>FAM240C</i>                                                                                                                  | Altai Neanderthal             | rs376150658-G/A              | 0.23 | .*                                                                                       | + 8                                      |
| chr4:82750503-83146792    | Fisher             | <i>SCD5</i> , <b><i>SEC31A</i></b> , <i>LIN54</i> , <i>COPSA4</i> , <i>PLAC8</i>                                                                                                                   | Denisova                      | rs4693058-C/T                | 0.76 | Blood composition (Table S13)                                                            | 0                                        |
| chr4:171791098-171986729  | Fisher             | <b><i>GALNTL6</i></b>                                                                                                                                                                              | .                             | rs926184421-G/A              | 0.08 | Other phenotypes* (Table S14)                                                            | + 14                                     |
| chr5:65504470-65708617    | XPEHH              | <b><i>CENPK</i></b> , <i>TRIM23</i> , <i>SGTB</i> , <i>PPWD1</i> , <i>SHLD3</i> , <i>TRAPPC13</i>                                                                                                  | .                             | rs36003688-T/C               | 0.31 | -                                                                                        | 0                                        |
| chr6:85266477-85483888    | PBS                | <b><i>NT5E</i></b>                                                                                                                                                                                 | .                             | rs989789809-T/C              | 0.14 | .*                                                                                       | + 13                                     |
| chr7:129548370-129836070  | XPEHH, Fisher      | <b><i>NRF1</i></b> , <i>UBE2H</i>                                                                                                                                                                  | Denisova                      | rs6950082-T/A                | 0.49 | Blood composition,<br>other phenotypes* (Table S14)                                      | + 3                                      |
| chr8:133791891-133962825  | PBS                | .                                                                                                                                                                                                  | .                             | rs187915256-C/T              | 0.99 | .*                                                                                       | + 1                                      |
| chr9:93717217-93877803    | XPEHH              | .                                                                                                                                                                                                  | .                             | rs372277219-G/T              | 0.22 | Other phenotypes* (Table S14)                                                            | + 143                                    |
| chr12:120353731-120666335 | Fisher             | <i>MSI1</i> , <b><i>COX6A1</i></b> , <i>GATC</i> , <i>TRIAP1</i> , <i>SRSF9</i> , <i>DYNLL1</i> , <i>COQ5</i> , <i>RNF10</i> , <i>POP5</i> , <i>CABP1</i>                                          | .                             | rs75047318-T/C               | 0.07 | Blood composition, body proportion, respiratory capacities, other phenotypes (Table S13) | 0                                        |
| chr13:61590770-61993327   | XPEHH              | .                                                                                                                                                                                                  | .                             | rs537391125-A/G              | 0.94 | Other phenotypes* (Table S14)                                                            | + 81                                     |
| chr13:89660867-89920623†  | Fisher             | .                                                                                                                                                                                                  | .                             | rs72634302-G/A               | 0.48 | -                                                                                        | 0                                        |
| chr14:37137933-37382802   | XPEHH              | <i>SLC25A21</i> , <b><i>MIPOL1</i></b>                                                                                                                                                             | .                             | rs1594377001-C/T             | 0.05 | .*                                                                                       | + 27                                     |
| chr14:77312867-77558267   | PBS, Fisher        | <i>POMT2</i> , <i>GSTZ1</i> , <i>SAMD15</i> , <i>NOXRED1</i> , <i>VIPAS39</i> , <i>ISM2</i> , <b><i>SPTLC2</i></b> , <i>TMED8</i> , <i>AHSA1</i>                                                   | .                             | rs12885954-C/T               | 0.57 | -                                                                                        | 0                                        |
| chr16:87806834-87928392   | XPEHH              | <b><i>SLC7A5</i></b> , <i>CA5A</i>                                                                                                                                                                 | .                             | rs2287123-G/A                | 0.32 | Other phenotypes (Table S13)                                                             | 0                                        |
| chr17:54003406-54222843   | XPEHH              | .                                                                                                                                                                                                  | Denisova                      | rs575590765-T/C              | 0.11 | .*                                                                                       | + 78                                     |
| chr18:41133289-41618597   | Fisher             | .                                                                                                                                                                                                  | .                             | rs2848745-G/C                | 0.95 | -                                                                                        | 0                                        |
| chr19:11708670-12108034   | PBS                | <i>ZNF823</i> , <i>ZNF441</i> , <i>ZNF491</i> , <i>ZNF440</i> , <i>ZNF439</i> , <i>ZNF69</i> , <i>ZNF700</i> , <i>ZNF763</i> , <i>ZNF433</i> , <i>ZNF20</i> , <i>ZNF878</i> , <b><i>ZNF844</i></b> | Altai Neanderthal             | rs900717974-C/T              | 0.11 | .*                                                                                       | + 32                                     |
| chr19:16344294-16576199   | XPEHH              | <b><i>EPS15L1</i></b> , <i>CALR3</i> , <i>CHERP</i> , <i>C19orf44</i> , <i>SLC35E1</i> , <i>MED26</i>                                                                                              | .                             | rs1870071-C/T                | 0.76 | Blood composition (Table S13)                                                            | 0                                        |
| chr19:54176104-54330609†  | PBS, Fisher        | <i>MBOAT7</i> , <i>TSEN34</i> , <b><i>RPS9</i></b> , <i>LILRB3</i> , <i>LILRA6</i> , <i>LILRB5</i> , <i>LILRB2</i> , <i>LILRA5</i>                                                                 | .                             | rs1600734199-A/T             | 0.13 | .*                                                                                       | + 90                                     |

616

617 Genomic coordinates are given for GRCh38

618 DAF is given for PNG lowlanders.

619 †Reference Assembly Alternate Haplotype Sequence Alignments

620 \*SNP not present in the UK Biobank, we look association for the closest SNP within 1KB upstream and downstream region

621 Genes in bold are the closest to the candidate SNP defined with CLUES for the region

622 Putative introgressed regions are given using haplostrips

## 623 References

- 624 1. Clarkson, C. *et al.* Human occupation of northern Australia by 65,000 years ago. *Nature* **547**,  
625 306–310 (2017).
- 626 2. O’Connell, J. F. *et al.* When did Homo sapiens first reach Southeast Asia and Sahul? *PNAS* **115**,  
627 8482–8490 (2018).
- 628 3. Brucato, N. *et al.* Papua New Guinean Genomes Reveal the Complex Settlement of North Sahul.  
629 *Molecular Biology and Evolution* (2021) doi:10.1093/molbev/msab238.
- 630 4. Summerhayes, G. R., Field, J. H., Shaw, B. & Gaffney, D. The archaeology of forest exploitation  
631 and change in the tropics during the Pleistocene: The case of Northern Sahul (Pleistocene New  
632 Guinea). *Quaternary International* **448**, 14–30 (2017).
- 633 5. Brookfield, H. & Allen, B. High-Altitude Occupation and Environment. *Mountain Research and*  
634 *Development* **9**, 201–209 (1989).
- 635 6. Müller, I., Bockarie, M., Alpers, M. & Smith, T. The epidemiology of malaria in Papua New  
636 Guinea. *Trends in Parasitology* **19**, 253–259 (2003).
- 637 7. Trájer, A. J., Sebestyén, V. & Domokos, E. The potential impacts of climate factors and malaria on  
638 the Middle Palaeolithic population patterns of ancient humans. *Quaternary International* **565**,  
639 94–108 (2020).
- 640 8. Beall, C. M. Adaptation to High Altitude: Phenotypes and Genotypes. *Annu. Rev. Anthropol.* **43**,  
641 251–272 (2014).
- 642 9. Moore, L. G. Human genetic adaptation to high altitudes: Current status and future prospects.  
643 *Quat. Int.* **461**, 4–13 (2017).
- 644 10. Bigham, A. W. & Lee, F. S. Human high-altitude adaptation: forward genetics meets the HIF  
645 pathway. *Genes Dev.* **28**, 2189–2204 (2014).
- 646 11. Lee, P., Chandel, N. S. & Simon, M. C. Cellular adaptation to hypoxia through hypoxia inducible  
647 factors and beyond. *Nat Rev Mol Cell Biol* **21**, 268–283 (2020).

- 648 12. Beall, C. M. *et al.* Hemoglobin concentration of high-altitude Tibetans and Bolivian Aymara.  
649 *American Journal of Physical Anthropology* **106**, 385–400 (1998).
- 650 13. Villafuerte, F. C. & Corante, N. Chronic Mountain Sickness: Clinical Aspects, Etiology,  
651 Management, and Treatment. *High Alt Med Biol* **17**, 61–69 (2016).
- 652 14. Stemberge, M. *et al.* The overlooked significance of plasma volume for successful adaptation to  
653 high altitude in Sherpa and Andean natives. *Proc Natl Acad Sci U S A* **116**, 16177–16179 (2019).
- 654 15. André, M. *et al.* Phenotypic differences between highlanders and lowlanders in Papua New  
655 Guinea. *PLOS ONE* **16**, e0253921 (2021).
- 656 16. Moore, L. G. Measuring high-altitude adaptation. *Journal of Applied Physiology* **123**, 1371–1385  
657 (2017).
- 658 17. Xue, B. & Leibler, S. Benefits of phenotypic plasticity for population growth in varying  
659 environments. *Proceedings of the National Academy of Sciences* **115**, 12745–12750 (2018).
- 660 18. GBD 2013 Mortality and Causes of Death Collaborators. Global, regional, and national age–sex  
661 specific all-cause and cause-specific mortality for 240 causes of death, 1990–2013: a systematic  
662 analysis for the Global Burden of Disease Study 2013. *The Lancet* **385**, 117–171 (2015).
- 663 19. Kitur, U., Adair, T., Riley, I. & Lopez, A. D. Estimating the pattern of causes of death in Papua New  
664 Guinea. *BMC Public Health* **19**, 1322 (2019).
- 665 20. Naraqi, S., Feling, B. & Leeder, S. R. Disease and death in Papua New Guinea. *Medical Journal of*  
666 *Australia* **178**, 7–8 (2003).
- 667 21. World Health Organization. *World malaria report 2021*. (World Health Organization, 2021).
- 668 22. Senn, N. *et al.* Population Hemoglobin Mean and Anemia Prevalence in Papua New Guinea: New  
669 Metrics for Defining Malaria Endemicity? *PLOS ONE* **5**, e9375 (2010).
- 670 23. Riley, I. D. Population change and distribution in Papua New Guinea: an epidemiological  
671 approach. *Journal of Human Evolution* **12**, 125–132 (1983).
- 672 24. Trájer, A. J. Late Quaternary changes in malaria-free areas in Papua New Guinea and the future  
673 perspectives. *Quaternary International* (2022) doi:10.1016/j.quaint.2022.04.003.

- 674 25. Reich, D. *et al.* Genetic history of an archaic hominin group from Denisova Cave in Siberia. *Nature*  
675 **468**, 1053–1060 (2010).
- 676 26. Larena, M. *et al.* Philippine Aytas possess the highest level of Denisovan ancestry in the world.  
677 *Curr Biol* S0960-9822(21)00977-5 (2021) doi:10.1016/j.cub.2021.07.022.
- 678 27. Huerta-Sánchez, E. *et al.* Genetic Signatures Reveal High-Altitude Adaptation in a Set of Ethiopian  
679 Populations. *Mol Biol Evol* **30**, 1877–1888 (2013).
- 680 28. Vespasiani, D. M. *et al.* Denisovan introgression has shaped the immune system of present-day  
681 Papuans. *PLOS Genetics* **18**, e1010470 (2022).
- 682 29. Choin, J. *et al.* Genomic insights into population history and biological adaptation in Oceania.  
683 *Nature* 1–7 (2021) doi:10.1038/s41586-021-03236-5.
- 684 30. Jacobs, G. S. *et al.* Multiple Deeply Divergent Denisovan Ancestries in Papuans. *Cell* **177**, 1010-  
685 1021.e32 (2019).
- 686 31. Brucato, N. *et al.* Chronology of natural selection in Oceanian genomes. *iScience* 104583 (2022)  
687 doi:10.1016/j.isci.2022.104583.
- 688 32. Bergström, A. *et al.* Insights into human genetic variation and population history from 929  
689 diverse genomes. *Science* **367**, (2020).
- 690 33. Malaspina, A.-S. *et al.* A genomic history of Aboriginal Australia. *Nature* **538**, 207–214 (2016).
- 691 34. Mallick, S. *et al.* The Simons Genome Diversity Project: 300 genomes from 142 diverse  
692 populations. *Nature* **538**, 201–206 (2016).
- 693 35. Vernot, B. *et al.* Excavating Neandertal and Denisovan DNA from the genomes of Melanesian  
694 individuals. *Science* **352**, 235–239 (2016).
- 695 36. The 1000 Genomes Project Consortium *et al.* A global reference for human genetic variation.  
696 *Nature* **526**, 68–74 (2015).
- 697 37. Chen, S., Zhou, Y., Chen, Y. & Gu, J. fastp: an ultra-fast all-in-one FASTQ preprocessor.  
698 *Bioinformatics* **34**, i884–i890 (2018).
- 699 38. broadinstitute/picard. (2022).

- 700 39. Poplin, R. *et al.* Scaling accurate genetic variant discovery to tens of thousands of samples.  
701 201178 Preprint at <https://doi.org/10.1101/201178> (2018).
- 702 40. Auwera, G. van der & O'Connor, B. D. *Genomics in the cloud: using Docker, GATK, and WDL in*  
703 *Terra*. (O'Reilly Media, 2020).
- 704 41. Patterson, N., Price, A. L. & Reich, D. Population Structure and Eigenanalysis. *PLOS Genetics* **2**,  
705 e190 (2006).
- 706 42. Purcell, S. *et al.* PLINK: A Tool Set for Whole-Genome Association and Population-Based Linkage  
707 Analyses. *Am J Hum Genet* **81**, 559–575 (2007).
- 708 43. Alexander, D. H., Novembre, J. & Lange, K. Fast model-based estimation of ancestry in unrelated  
709 individuals. *Genome Res* **19**, 1655–1664 (2009).
- 710 44. Delaneau, O., Zagury, J.-F., Robinson, M. R., Marchini, J. L. & Dermitzakis, E. T. Accurate, scalable  
711 and integrative haplotype estimation. *Nature Communications* **10**, 5436 (2019).
- 712 45. Yi, X. *et al.* Sequencing of 50 Human Exomes Reveals Adaptation to High Altitude. *Science* **329**,  
713 75–78 (2010).
- 714 46. Sabeti, P. C. *et al.* Genome-wide detection and characterization of positive selection in human  
715 populations. *Nature* **449**, 913–918 (2007).
- 716 47. Szpiech, Z. A. & Hernandez, R. D. selscan: an efficient multithreaded program to perform EHH-  
717 based scans for positive selection. *Mol Biol Evol* **31**, 2824–2827 (2014).
- 718 48. Lopez, M. *et al.* Genomic Evidence for Local Adaptation of Hunter-Gatherers to the African  
719 Rainforest. *Current Biology* **29**, 2926-2935.e4 (2019).
- 720 49. Speidel, L., Forest, M., Shi, S. & Myers, S. R. A method for genome-wide genealogy estimation for  
721 thousands of samples. *Nature Genetics* **51**, 1321–1329 (2019).
- 722 50. Stern, A. J., Wilton, P. R. & Nielsen, R. An approximate full-likelihood method for inferring  
723 selection and allele frequency trajectories from DNA sequence data. *PLOS Genetics* **15**, e1008384  
724 (2019).
- 725 51. Pan-UKB team. <https://pan.ukbb.broadinstitute.org> (2020).

- 726 52. Zhou, X. & Stephens, M. Genome-wide efficient mixed-model analysis for association studies.  
727 *Nat Genet* **44**, 821–824 (2012).
- 728 53. Benjamini, Y. & Hochberg, Y. Controlling the False Discovery Rate: A Practical and Powerful  
729 Approach to Multiple Testing. *Journal of the Royal Statistical Society. Series B (Methodological)*  
730 **57**, 289–300 (1995).
- 731 54. Yekutieli, D. & Benjamini, Y. Resampling-based false discovery rate controlling multiple test  
732 procedures for correlated test statistics. *Journal of Statistical Planning and Inference* **82**, 171–196  
733 (1999).
- 734 55. Marnetto, D. & Huerta-Sánchez, E. Haplostrips: revealing population structure through haplotype  
735 visualization. *Methods in Ecology and Evolution* **8**, 1389–1392 (2017).
- 736 56. Prüfer, K. *et al.* The complete genome sequence of a Neandertal from the Altai Mountains.  
737 *Nature* **505**, 43–49 (2014).
- 738 57. Meyer, M. *et al.* A High-Coverage Genome Sequence from an Archaic Denisovan Individual.  
739 *Science* **338**, 222–226 (2012).
- 740 58. Prüfer, K. *et al.* A high-coverage Neandertal genome from Vindija Cave in Croatia. *Science* **358**,  
741 655–658 (2017).
- 742 59. Lonsdale, J. *et al.* The Genotype-Tissue Expression (GTEx) project. *Nat Genet* **45**, 580–585 (2013).
- 743 60. Kundaje, A. *et al.* Integrative analysis of 111 reference human epigenomes. *Nature* **518**, 317–30  
744 (2015).
- 745 61. McLaren, W. *et al.* The Ensembl Variant Effect Predictor. *Genome Biology* **17**, 122 (2016).
- 746 62. Godyna, S., Diaz-Ricart, M. & Argraves, W. Fibulin-1 mediates platelet adhesion via a bridge of  
747 fibrinogen. *Blood* **88**, 2569–2577 (1996).
- 748 63. Gudjonsson, A. *et al.* A genome-wide association study of serum proteins reveals shared loci with  
749 common diseases. *Nat Commun* **13**, 480 (2022).
- 750 64. Rasmussen, A. H., Rasmussen, H. B. & Silahtaroglu, A. The DLGAP family: neuronal expression,  
751 function and role in brain disorders. *Molecular Brain* **10**, 43 (2017).

- 752 65. Trowsdale, J. & Knight, J. C. Major Histocompatibility Complex Genomics and Human Disease.  
753 *Annual Review of Genomics and Human Genetics* **14**, 301–323 (2013).
- 754 66. Peng, C. *et al.* LRIG3 Suppresses Angiogenesis by Regulating the PI3K/AKT/VEGFA Signaling  
755 Pathway in Glioma. *Frontiers in Oncology* **11**, (2021).
- 756 67. Zhou, H. *et al.* Member Domain 3 (LRIG3) Activates Hypoxia-Inducible Factor-1  $\alpha$  /Vascular  
757 Endothelial Growth Factor (HIF-1  $\alpha$  /VEGF) Pathway to Inhibit the Growth of Bone Marrow  
758 Mesenchymal Stem Cells in Glioma. *J biomater tissue eng* **11**, 1022–1027 (2021).
- 759 68. Bai, Z., Xu, L., Dai, Y., Yuan, Q. & Zhou, Z. ECM2 and GLT8D2 in human pulmonary artery  
760 hypertension: fruits from weighted gene co-expression network analysis. *J Thorac Dis* **13**, 2242–  
761 2254 (2021).
- 762 69. Takahashi, Y. *et al.* A genome-wide association study identifies a novel candidate locus at the  
763 DLGAP1 gene with susceptibility to resistant hypertension in the Japanese population. *Sci Rep*  
764 **11**, 19497 (2021).
- 765 70. Hansen, K. B. *et al.* PTPRG is an ischemia risk locus essential for HCO<sub>3</sub>—dependent regulation of  
766 endothelial function and tissue perfusion. *eLife* **9**, e57553.
- 767 71. Adeyemo, A. *et al.* A Genome-Wide Association Study of Hypertension and Blood Pressure in  
768 African Americans. *PLOS Genetics* **5**, e1000564 (2009).
- 769 72. Slade, C. D., Reagin, K. L., Lakshmanan, H. G., Klonowski, K. D. & Watford, W. T. Placenta-specific  
770 8 limits IFN $\gamma$  production by CD4 T cells in vitro and promotes establishment of influenza-specific  
771 CD8 T cells in vivo. *PLOS ONE* **15**, e0235706 (2020).
- 772 73. Long, L. *et al.* CRISPR screens unveil signal hubs for nutrient licensing of T cell immunity. *Nature*  
773 **600**, 308–313 (2021).
- 774 74. Shinohara, T., Taniwaki, M., Ishida, Y., Kawaichi, M. & Honjo, T. Structure and Chromosomal  
775 Localization of the Human PD-1 Gene (PDCD1). *Genomics* **23**, 704–706 (1994).
- 776 75. Liu, R., King, A., Tarlinton, D. & Heierhorst, J. The ASCIZ-DYNLL1 Axis Is Essential for TLR4-  
777 Mediated Antibody Responses and NF- $\kappa$ B Pathway Activation. *Mol Cell Biol* **41**, e0025121 (2021).

- 778 76. Tretina, K., Park, E.-S., Maminska, A. & MacMicking, J. D. Interferon-induced guanylate-binding  
779 proteins: Guardians of host defense in health and disease. *J Exp Med* **216**, 482–500 (2019).
- 780 77. Mathieson, I. The omnigenic model and polygenic prediction of complex traits. *The American*  
781 *Journal of Human Genetics* **108**, 1558–1563 (2021).
- 782 78. Mafessoni, F. *et al.* A high-coverage Neandertal genome from Chagyrskaya Cave. *Proceedings of*  
783 *the National Academy of Sciences* **117**, 15132–15136 (2020).
- 784 79. Lee, J. H. *et al.* Further examination of the candidate genes in chromosome 12p13 locus for late-  
785 onset Alzheimer disease. *Neurogenetics* **9**, 127–138 (2008).
- 786 80. Li, Y., Chu, L. W., Li, Z., Yik, P.-Y. & Song, Y.-Q. A Study on the Association of the Chromosome  
787 12p13 Locus with Sporadic Late-Onset Alzheimer’s Disease in Chinese. *DEM* **27**, 508–512 (2009).
- 788 81. Sanders, S. J. *et al.* De novo mutations revealed by whole-exome sequencing are strongly  
789 associated with autism. *Nature* **485**, 237–241 (2012).
- 790 82. Zhang, P. *et al.* Non-SMC condensin I complex, subunit D2 gene polymorphisms are associated  
791 with Parkinson’s disease: a Han Chinese study. *Genome* **57**, 253–257 (2014).
- 792 83. Eichstaedt, C. A. *et al.* Genetic and phenotypic differentiation of an Andean intermediate altitude  
793 population. *Physiol Rep* **3**, e12376 (2015).
- 794 84. Rimoldi, S. F. *et al.* Acute and Chronic Altitude-Induced Cognitive Dysfunction in Children  
795 and Adolescents. *The Journal of Pediatrics* **169**, 238–243 (2016).
- 796 85. Yan, X., Zhang, J., Shi, J., Gong, Q. & Weng, X. Cerebral and functional adaptation with chronic  
797 hypoxia exposure: A multi-modal MRI study. *Brain Research* **1348**, 21–29 (2010).
- 798 86. Chen, X. *et al.* Cognitive and neuroimaging changes in healthy immigrants upon relocation to a  
799 high altitude: A panel study. *Human Brain Mapping* **38**, 3865–3877 (2017).
- 800 87. Turner, R. E. F., Gatterer, H., Falla, M. & Lawley, J. S. High-altitude cerebral edema: its own entity  
801 or end-stage acute mountain sickness? *Journal of Applied Physiology* **131**, 313–325 (2021).



- 802 88. Inoue, T., Iseki, K., Iseki, C. & Kinjo, K. Elevated Resting Heart Rate Is Associated With White  
803 Blood Cell Count in Middle-Aged and Elderly Individuals Without Apparent Cardiovascular  
804 Disease. *Angiology* **63**, 541–546 (2012).
- 805 89. Apinjoh, T. O. *et al.* Association of candidate gene polymorphisms and TGF-beta/IL-10 levels with  
806 malaria in three regions of Cameroon: a case–control study. *Malaria Journal* **13**, 236 (2014).
- 807
